# Supplementary material for: A dodecanethiol-functionalized Ag nanoparticle-modified ITO anode for efficient performance of organic light-emitting devices
Source: Royal Society of Chemistry journal article supplement (doi:10.1039/c7ra07080b), 2017-01-01

### Supporting information

**Dodecanethiol-functionalized Ag nanoparticles modified ITO anode for efficient performances of organic light-emitting devices**

**Jayaraman Jayabharathi\*, Ganapathy Abirama Sundari, Venugopal Thanikachalam, Palanivel Jeeva and Sekar Panimozhi**

*Department of Chemistry, Annamalai University, Annamalainagar 608 002, Tamilnadu, India*

\* Tel: +91 9443940735; *E-mail address:* jtchalam2005@yahoo.co.in.

**Scheme S1:** Synthetic route of iridium(III)-bis-4-((*E*)-2-(1-(4-methoxyphenyl)-1H-phenanthro[9,10-d]-imidazolato-N,C<sup>2</sup>)) (acetylacetonate) [Ir(mpIdmb)<sub>2</sub>(acac)]

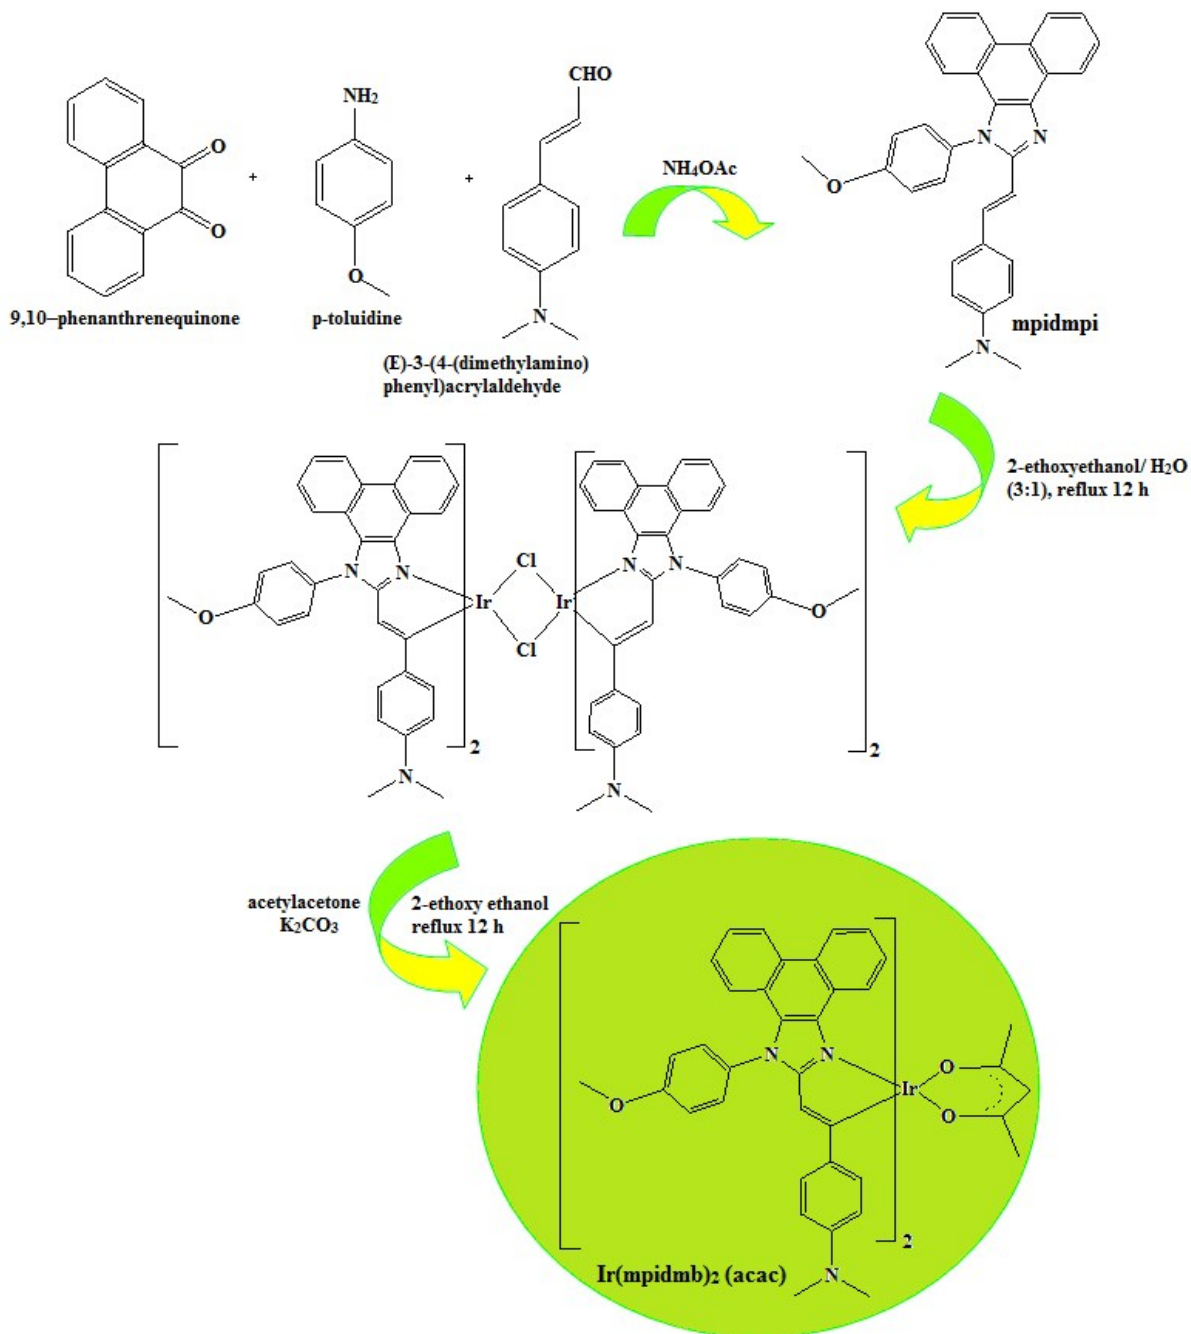

**Scheme S2:** Schematic representation of coupling mechanism

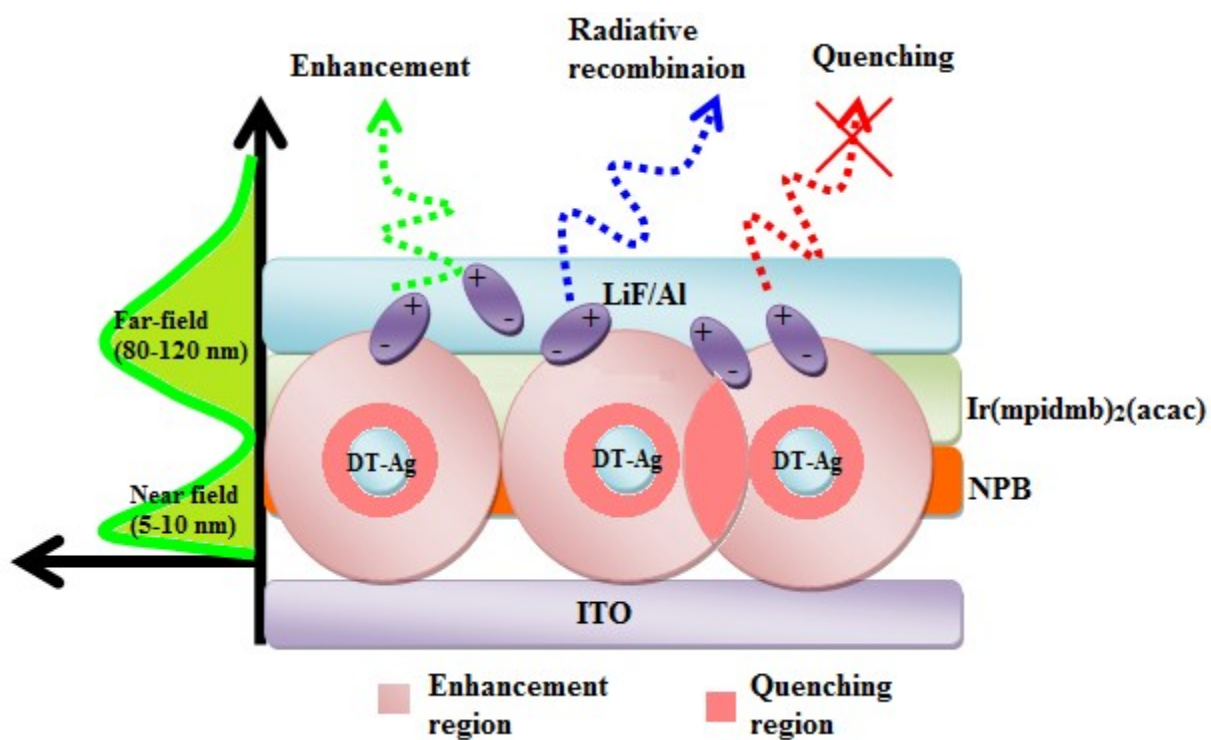

**Figure S1:** AFM images of devices I-IV

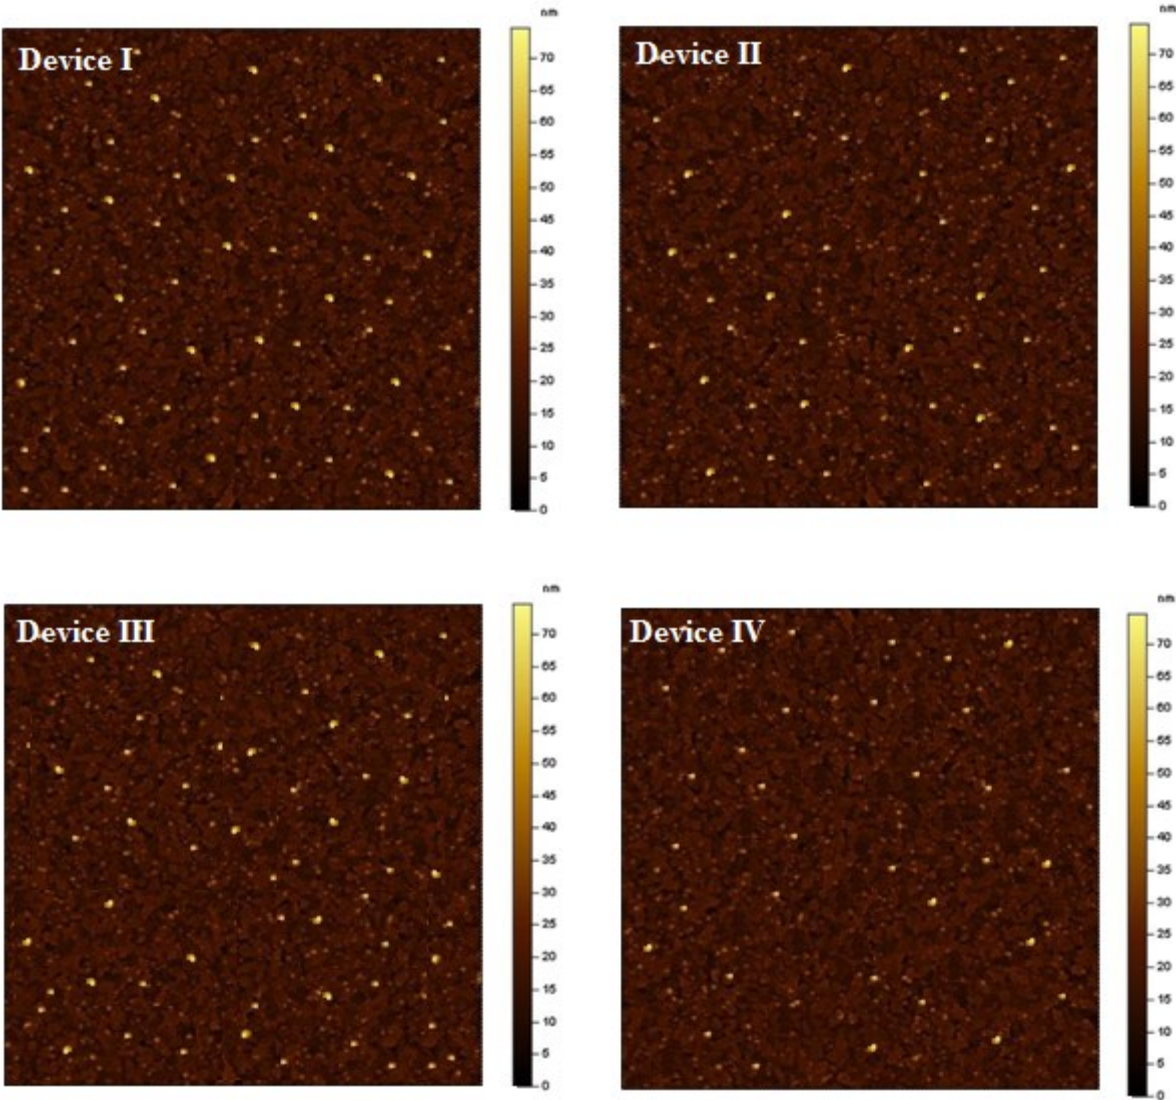

**Figure S2:** XPS core level spectra of indium 3d and tin 3d along with bare ITO and ITO/DT-Ag NPs

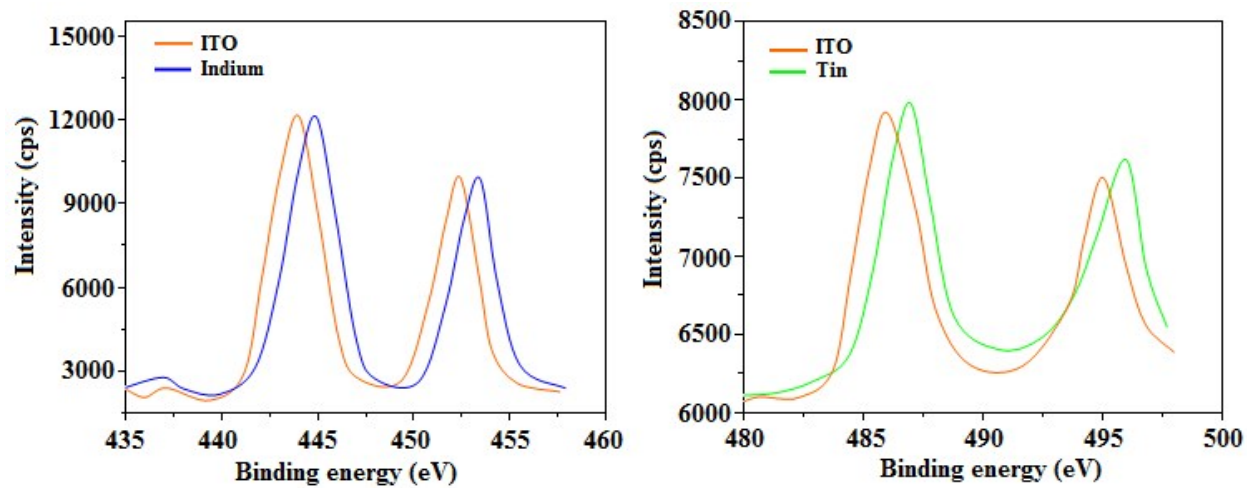

**Figure S3:** Schematic energy level diagram of ITO/NPB interface without and with DT-Ag NPs

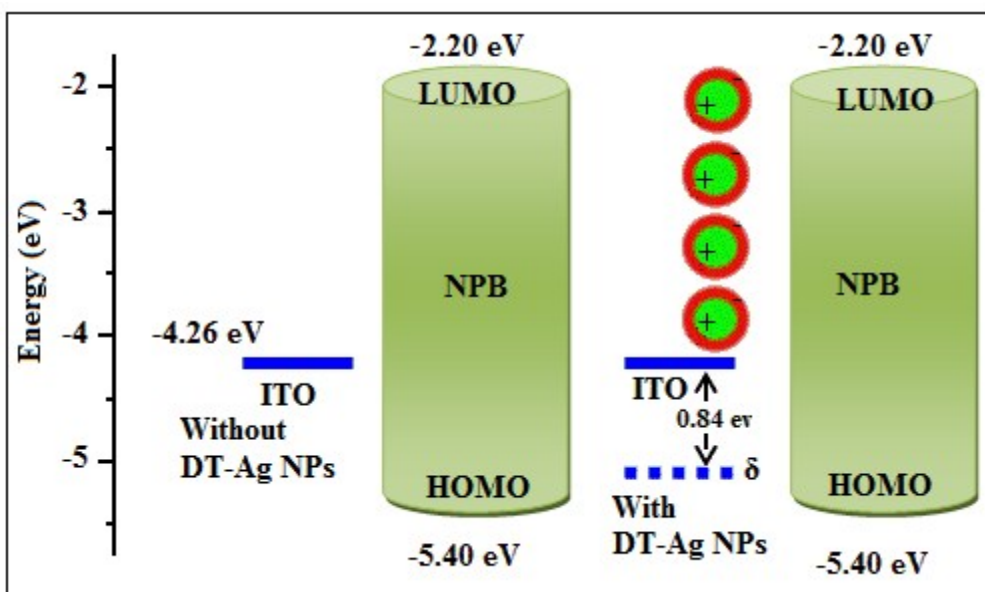

Supplement: c7ra07080b1.pdf [file c7ra07080b1.pdf]
